# Supplementary material for: Thermoplastic Elastomer (TPE)–Poly(Methyl Methacrylate) (PMMA) Hybrid Devices for Active Pumping PDMS-Free Organ-on-a-Chip Systems
Source: MDPI journal article supplement (doi:10.3390/bios11050162), 2021-05-19
Supplement: s1 [file s1]

## Supplementary Material

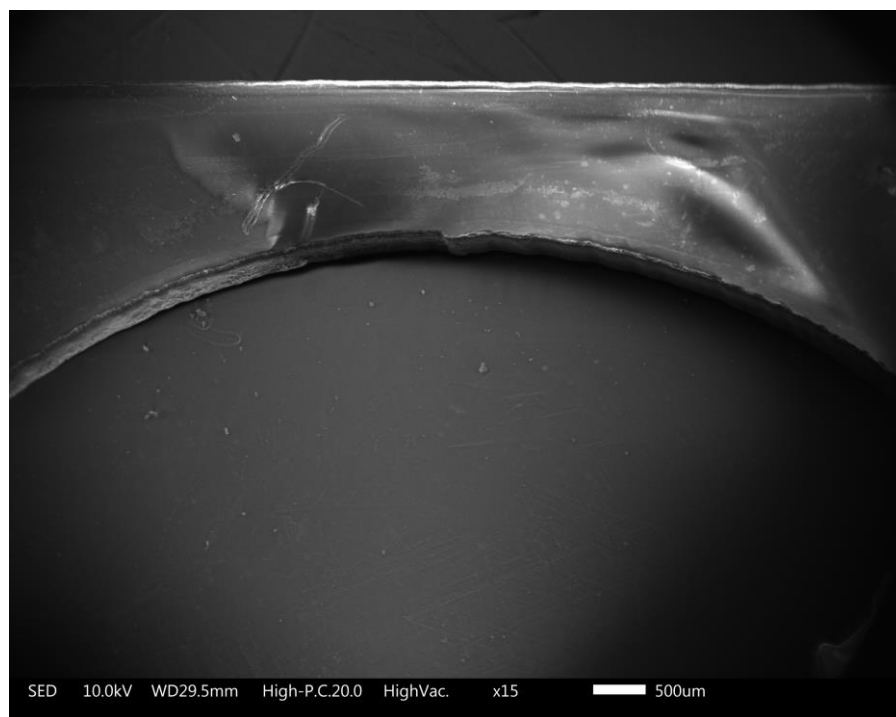

**Fig. S1:** SEM image of a laser-cut 250 μm PMMA film bonded to a 1.5 mm PMMA sheet, imaged after pressure testing (delamination)

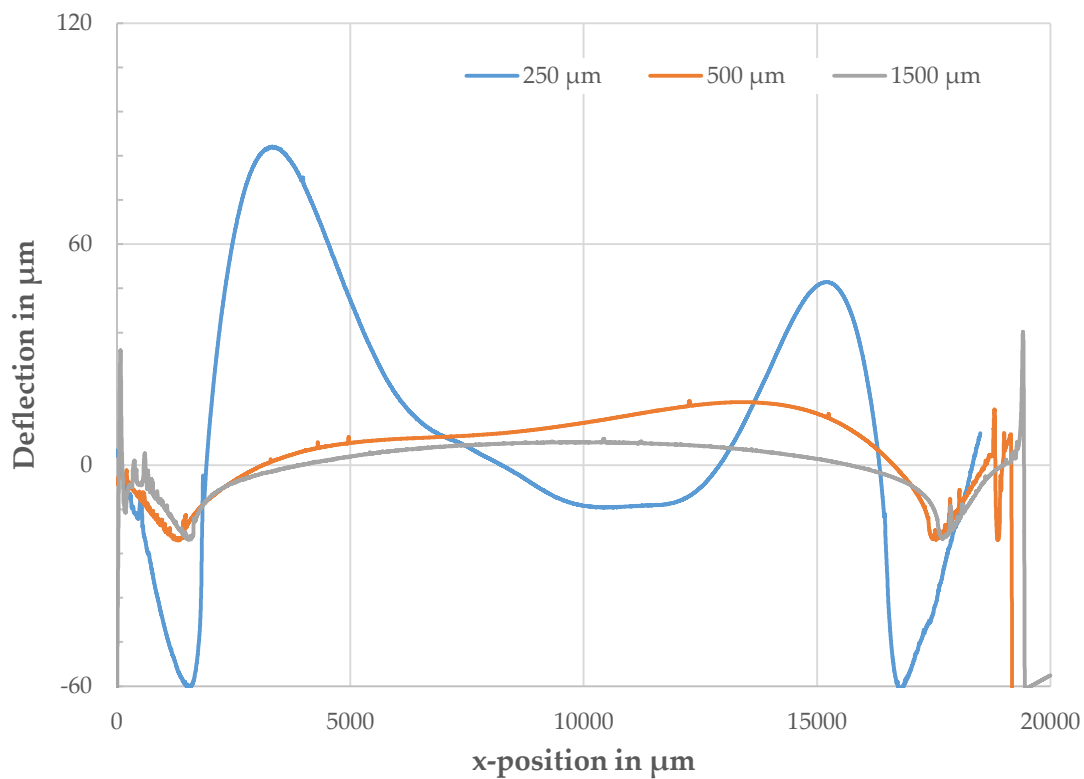

**Fig. S2:** Distortion of different thick PMMA substrate after thermal bonding (pressure: 2.4 MPa, temperature: 84 °C, UV dose: 3 J/cm<sup>2</sup>). Samples were obtained after pressure testing and deflection was measured with a profilometer (line-scan).

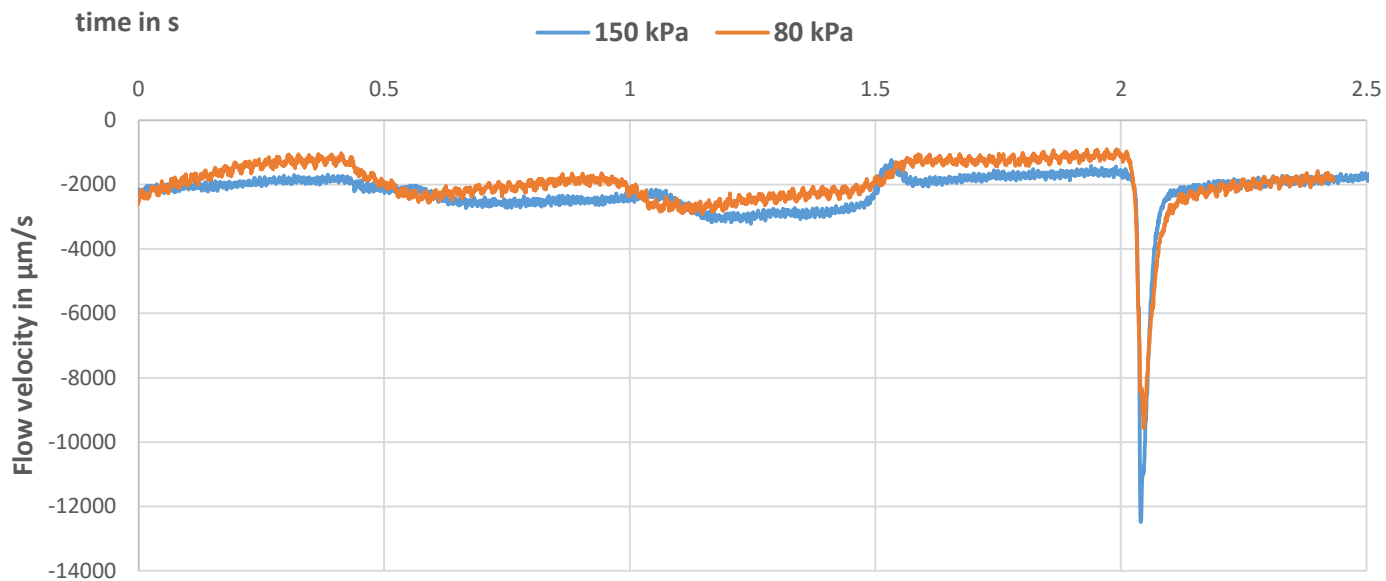

**Fig. S 3:** Velocity time curves for a driving pressure of 80 and 150 kPa at an actuation frequency of 1.2 Hz and a driving vacuum of -80 kPa. Measured in a 1 mm wide and 0.5 mm high channel.

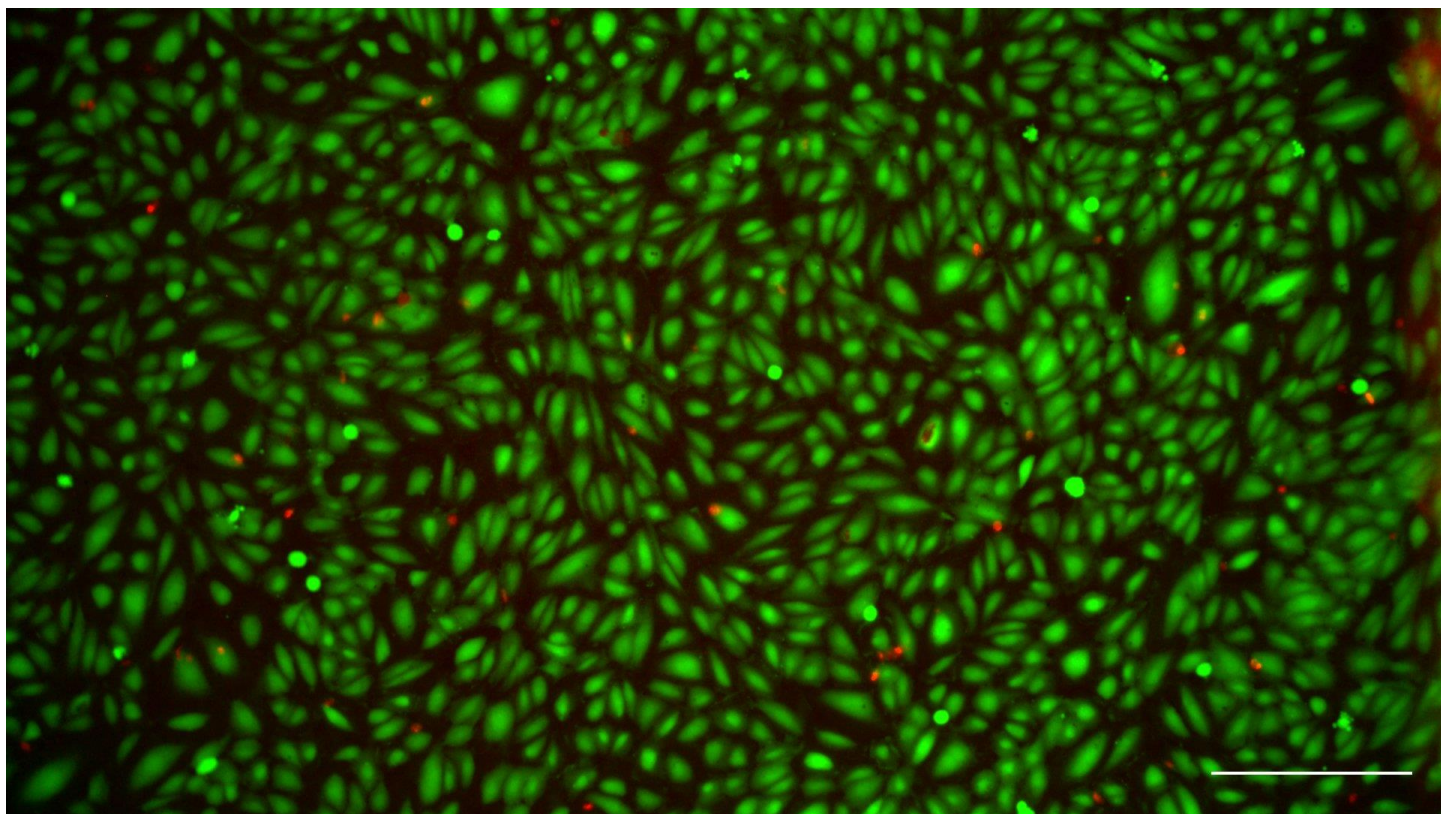

**Fig. S 4:** Live-dead staining of HUVEC cells after 24h cultivation on-chip (control: perfusion on tilting platform). Green: living cells. Red: Dead cells. Scale bar: 200  $\mu\text{m}$



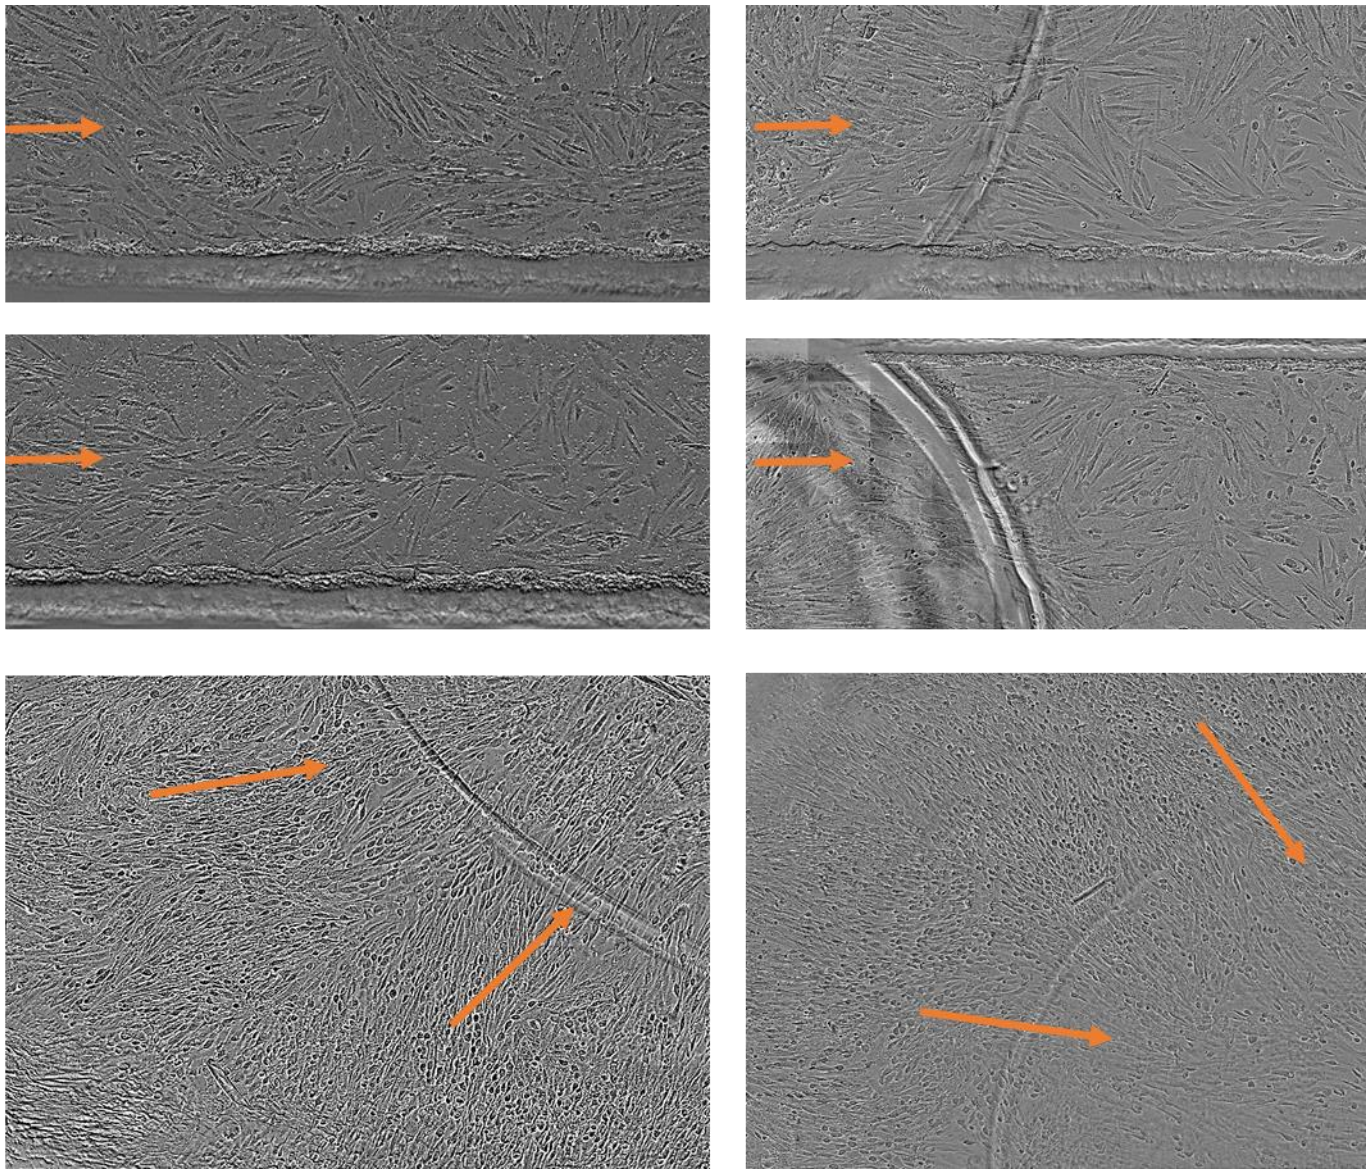

**Fig. S 5:** Phase contrast images of HLECP2 cells cultivated under flow (orange arrow) and used for analysis of the orientation.

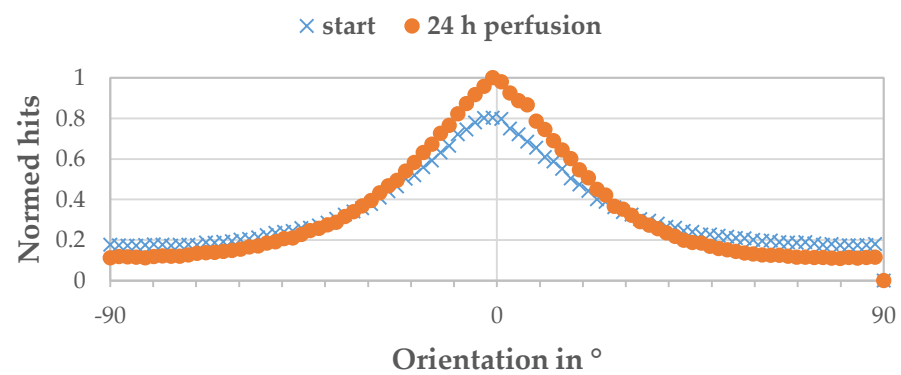

**Fig. S 6:** Normalized histogram of HLEC cells cultivated under flow at the beginning and end of the experiment
